# Supplementary material for: Non-EPI Vaccine Hesitancy among Chinese Adults: A Cross-Sectional Study
Source: Vaccines (Basel). 2021 Jul 10;9(7):772. doi: 10.3390/vaccines9070772 (PMC8310190; doi:10.3390/vaccines9070772)
Supplement: Supplementary file 1 [file vaccines-09-00772-s001.zip › Supplementary Table S1.pdf]

**Supplemental Table S1. Fifteen-item Likert scale of vaccine hesitancy**

| No. | Content                                                                                                                               |
|-----|---------------------------------------------------------------------------------------------------------------------------------------|
| 1   | Generally, I think the vaccine is safe                                                                                                |
| 2   | Generally, I think the vaccine is effective                                                                                           |
| 3   | I think vaccines are very important for my health                                                                                     |
| 4   | Generally, I think the whole chain (whole process, from production to vaccination) management of vaccine is safe and effective        |
| 5   | Please evaluate the degree of vaccine information and service trust you have provided to:                                             |
| 5.1 | Doctor or nurse                                                                                                                       |
| 5.2 | Centers for disease control, hospitals, vaccination clinics or other                                                                  |
| 5.3 | Vaccine manufacturers and companies                                                                                                   |
| 6   | Please evaluate your trust in the vaccination information provided by the government                                                  |
| 7   | I think if I don't get the vaccine, I may get the disease                                                                             |
| 8   | In my opinion, immunity from natural diseases is better than vaccination                                                              |
| 9   | Because of the low risk of disease, there is no need for vaccination                                                                  |
| 10  | Even if I have a disease, I can resist it, so I don't need a vaccine                                                                  |
| 11  | Generally, the poor service quality of vaccination clinic will make me not want to vaccinate again                                    |
| 12  | Generally, it's very convenient and time-consuming for me to get vaccinated                                                           |
| 13  | Generally, I was able to get the vaccine I wanted                                                                                     |
| 14  | Generally, I can afford the vaccine                                                                                                   |
| 15  | Generally, it would be good for me not to get vaccinated<br>(e.g. don't spend money, don't worry about side effects of vaccine, etc.) |
