# Supplementary material for: Non-EPI Vaccine Hesitancy among Chinese Adults: A Cross-Sectional Study
Source: Vaccines (Basel). 2021 Jul 10;9(7):772. doi: 10.3390/vaccines9070772 (PMC8310190; doi:10.3390/vaccines9070772)
Supplement: Supplementary file 1 [file vaccines-09-00772-s001.zip › Supplementary Table S2.pdf]

**Supplemental Table S2. Item selection in the development of the vaccine hesitancy scale**

| Dimension         | Item                                                                                                                                 | Critical ratio<br>method p value | Correlation<br>coefficient with<br>total score | Cronbach's $\alpha$ coefficient<br>after deleting the item |
|-------------------|--------------------------------------------------------------------------------------------------------------------------------------|----------------------------------|------------------------------------------------|------------------------------------------------------------|
| <b>Confidence</b> | Q1.Generally, I think the vaccine is safe                                                                                            |                                  | 0.853**                                        | 0.670                                                      |
|                   | Q2.Generally, I think the vaccine is effective                                                                                       |                                  | 0.856**                                        | 0.671                                                      |
|                   | Q3.I think vaccines are very important for my health                                                                                 |                                  | 0.854**                                        | 0.669                                                      |
|                   | Q4.Generally, I think the whole chain (whole process, from production to vaccination) management of vaccine is safe and effective    |                                  | 0.849**                                        | 0.672                                                      |
|                   | Q6.Please evaluate your trust in the vaccination information provided by the government                                              |                                  | 0.789**                                        | 0.674                                                      |
| <b>Complacent</b> | Q7.I think if I don't get the vaccine, I may get the disease                                                                         |                                  | -0.017                                         | 0.703                                                      |
|                   | Q8.In my opinion, immunity from natural diseases is better than vaccination                                                          | <0.001                           | 0.760**                                        | 0.699                                                      |
|                   | Q9.Because of the low risk of disease, there is no need for vaccination                                                              |                                  | 0.872**                                        | 0.671                                                      |
|                   | Q10.Even if I have a disease, I can resist it, so I don't need a vaccine                                                             |                                  | 0.866**                                        | 0.684                                                      |
|                   | Q11.Generally, the poor service quality of vaccination clinic will make me not want to vaccinate again                               |                                  | 0.536**                                        | 0.686                                                      |
| <b>Convenient</b> | Q12.Generally, it's very convenient and time-consuming for me to get vaccinated                                                      |                                  | 0.516**                                        | 0.687                                                      |
|                   | Q13.Generally, I was able to get the vaccine I wanted                                                                                |                                  | 0.502**                                        | 0.687                                                      |
|                   | Q14.Generally, I can afford the vaccine                                                                                              |                                  | 0.508**                                        | 0.684                                                      |
|                   | Q15.Generally,it would be good for me not to get vaccinated (e.g. don't spend money,don't worry about side effects of vaccine, etc.) |                                  | 0.431**                                        | 0.692                                                      |

\*\* represents  $P < 0.001$
