# Supplementary material for: Non-EPI Vaccine Hesitancy among Chinese Adults: A Cross-Sectional Study
Source: Vaccines (Basel). 2021 Jul 10;9(7):772. doi: 10.3390/vaccines9070772 (PMC8310190; doi:10.3390/vaccines9070772)
Supplement: Supplementary file 1 [file vaccines-09-00772-s001.zip › Supplementary Table S3.pdf]

**Supplemental Table S3. Factor-loading matrices in exploratory factor analysis**

| Entry | Factor 1 | Factor 2 | Factor 3 |
|-------|----------|----------|----------|
| Q1    | 0.851    | -0.067   | 0.192    |
| Q2    | 0.864    | -0.072   | 0.163    |
| Q3    | 0.848    | -0.061   | 0.190    |
| Q4    | 0.814    | -0.098   | 0.247    |
| Q6    | 0.735    | -0.036   | 0.255    |
| Q8    | -0.148   | 0.747    | -0.097   |
| Q9    | 0.047    | 0.866    | -0.115   |
| Q10   | -0.044   | 0.882    | -0.148   |
| Q11   | -0.082   | 0.772    | 0.026    |
| Q12   | 0.305    | -0.155   | 0.763    |
| Q13   | 0.301    | -0.159   | 0.797    |
| Q14   | 0.224    | -0.063   | 0.799    |
| Q15   | -0.071   | 0.758    | -0.115   |
