# Supplementary material for: Non-EPI Vaccine Hesitancy among Chinese Adults: A Cross-Sectional Study
Source: Vaccines (Basel). 2021 Jul 10;9(7):772. doi: 10.3390/vaccines9070772 (PMC8310190; doi:10.3390/vaccines9070772)
Supplement: Supplementary file 1 [file vaccines-09-00772-s001.zip › Supplementary Table S4.pdf]

**Supplemental Table S4. The reliability of the vaccine hesitancy scale**

| Dimension   | The number of items | Cronbach's $\alpha$ |
|-------------|---------------------|---------------------|
| Full scale  | 11                  | 0.688               |
| Confidence  | 5                   | 0.906               |
| Complacency | 3                   | 0.853               |
| Convenience | 3                   | 0.798               |
