# Supplementary material for: Non-EPI Vaccine Hesitancy among Chinese Adults: A Cross-Sectional Study
Source: Vaccines (Basel). 2021 Jul 10;9(7):772. doi: 10.3390/vaccines9070772 (PMC8310190; doi:10.3390/vaccines9070772)
Supplement: Supplementary file 1 [file vaccines-09-00772-s001.zip › Supplementary Table S5.pdf]

**Supplementary Table S5. Model fit indexes in confirmatory factor analysis**

| Model         | $\chi^2$ | df | $\chi^2/\text{df}$ | RMSEA | GFI   | AGFI  |
|---------------|----------|----|--------------------|-------|-------|-------|
| 13 items      | 7565.323 | 62 | 122.021            | 0.129 | 0.851 | 0.782 |
| Exxcept Q11   | 4052.476 | 51 | 79.460             | 0.104 | 0.925 | 0.885 |
| Except Q11\15 | 861.624  | 41 | 21.015             | 0.052 | 0.979 | 0.966 |
