# Supplementary material for: Non-EPI Vaccine Hesitancy among Chinese Adults: A Cross-Sectional Study
Source: Vaccines (Basel). 2021 Jul 10;9(7):772. doi: 10.3390/vaccines9070772 (PMC8310190; doi:10.3390/vaccines9070772)
Supplement: Supplementary file 1 [file vaccines-09-00772-s001.zip › Supplementary Table S6.pdf]

**Supplementary Table S6. Fitness test in the multivariate structural equation model of vaccine hesitancy among adults**

| Index                 | RMSEA | GFI   | AGFI  | NFI   | CFI   |
|-----------------------|-------|-------|-------|-------|-------|
| Model matching degree | 0.054 | 0.945 | 0.924 | 0.760 | 0.768 |
| Recommended value     | <0.06 | >0.90 | >0.90 | >0.90 | >0.90 |
