# Supplementary material for: Non-EPI Vaccine Hesitancy among Chinese Adults: A Cross-Sectional Study
Source: Vaccines (Basel). 2021 Jul 10;9(7):772. doi: 10.3390/vaccines9070772 (PMC8310190; doi:10.3390/vaccines9070772)
Supplement: Supplementary file 1 [file vaccines-09-00772-s001.zip › Supplementary Table S7.pdf]

**Supplemental Table S7. Multivariate analysis of factors affecting non-EPI and COVID-19 vaccine hesitancy**

| Demographic characteristics                 |                                                                                              | Non-EPI vaccines   |                | COVID-19 vaccines  |                |
|---------------------------------------------|----------------------------------------------------------------------------------------------|--------------------|----------------|--------------------|----------------|
|                                             |                                                                                              | <i>OR, 95%CI</i>   | <i>P-value</i> | <i>OR, 95%CI</i>   | <i>P-value</i> |
| <b>Age</b>                                  | 18-25 (Reference)                                                                            |                    |                |                    |                |
|                                             | 26-35                                                                                        | 0.683(0.590,0.790) | 0.000          | -                  | -              |
|                                             | ≥46                                                                                          | 0.536(0.439,0.654) | 0.000          | -                  | -              |
| <b>Educational level</b>                    | Junior high school or below (Reference)                                                      |                    |                |                    |                |
|                                             | High school graduate or equivalent                                                           | 0.802(0.627,1.027) | 0.080          | 1.103(0.831,1.464) | 0.497          |
|                                             | College or equivalent                                                                        | 0.752(0.597,0.948) | 0.016          | 1.075(0.825,1.401) | 0.591          |
|                                             | Master's Diploma or above                                                                    | 0.894(0.685,1.166) | 0.408          | 1.372(1.012,1.860) | 0.041          |
| <b>Occupation</b>                           | Government agencies and institutions (Reference)                                             |                    |                |                    |                |
|                                             | Enterprise / business / service industry                                                     | 1.153(1.000,1.328) | 0.050          | 0.888(0.753,1.047) | 0.158          |
|                                             | Agricultural, forestry, animal husbandry, fishery and water conservancy production personnel | 1.255(1.027,1.534) | 0.026          | 0.946(0.737,1.215) | 0.665          |
|                                             | Soldier                                                                                      | 0.547(0.371,0.807) | 0.002          | 0.957(0.514,1.783) | 0.890          |
|                                             | Full-time student                                                                            | 1.115(0.909,1.367) | 0.297          | 1.124(0.935,1.35)  | 0.214          |
|                                             | Other                                                                                        | 1.248(1.026,1.517) | 0.026          | 1.574(1.283,1.932) | 0.000          |
|                                             |                                                                                              |                    |                |                    |                |
| <b>Number of contacts per day</b>           | 1-10 (Reference)                                                                             |                    |                |                    |                |
|                                             | 11-20                                                                                        | 1.158(1.024,1.310) | 0.019          | 1.046(0.909,1.205) | 0.529          |
|                                             | ≥21                                                                                          | 0.817(0.695,0.960) | 0.014          | 0.776(0.642,0.938) | 0.009          |
| <b>Self-reported health</b>                 | Very good (Reference)                                                                        |                    |                |                    |                |
|                                             | Good                                                                                         | 1.112(0.995,1.243) | 0.062          | 1.484(1.308,1.684) | 0.000          |
|                                             | Common                                                                                       | 1.538(1.299,1.822) | 0.000          | 2.014(1.698,2.389) | 0.000          |
|                                             | Bad                                                                                          | 1.586(0.843,2.983) | 0.152          | 2.496(1.390,4.484) | 0.002          |
|                                             | Very bad                                                                                     | 0.504(0.205,1.236) | 0.134          | 1.505(0.510,4.443) | 0.459          |
| <b>Having influenza vaccination</b>         | Yes                                                                                          |                    |                |                    |                |
|                                             | No                                                                                           | 1.801(1.591,2.038) | 0.000          | 2.995(2.536,3.539) | 0.000          |
| <b>Healthcare occupation</b>                | Yes                                                                                          |                    |                |                    |                |
|                                             | No                                                                                           | 0.635(0.56,0.719)  | 0              | 1.426(1.232,1.651) | 0.000          |
| <b>Place of abode</b>                       | East (Reference)                                                                             |                    |                |                    |                |
|                                             | Central                                                                                      | -                  | -              | 0.681(0.582,0.798) | 0.000          |
|                                             | West                                                                                         | -                  | -              | 0.821(0.705,0.955) | 0.011          |
| <b>Annual household income (RMB 10,000)</b> |                                                                                              |                    |                |                    |                |
|                                             | <5 (Reference)                                                                               |                    |                |                    |                |

|       |   |   |                    |       |
|-------|---|---|--------------------|-------|
| 5-10  | - | - | 1.029(0.870,1.216) | 0.740 |
| 11-15 | - | - | 0.922(0.762,1.114) | 0.399 |
| ≥16   | - | - | 1.465(1.211,1.772) | 0.000 |

---
